# Supplementary material for: Patients’ Perspectives on Commencing Oral Anticoagulants in Atrial Fibrillation: An Exploratory Qualitative Descriptive Study
Source: MDPI journal article supplement (doi:10.3390/pharmacy11050153), 2023-09-23
Supplement: s1 [file s1]

| TDF domains                                                                                                                                                                                          | Operational definitions                                                                                                                                                                                                                                                                                              |
|------------------------------------------------------------------------------------------------------------------------------------------------------------------------------------------------------|----------------------------------------------------------------------------------------------------------------------------------------------------------------------------------------------------------------------------------------------------------------------------------------------------------------------|
| <b>Knowledge</b> (An awareness of existence of something)                                                                                                                                            | <ul style="list-style-type: none"> <li>• Awareness that AF increases the risk of blood clotting and/or stroke risk.</li> <li>• Awareness and knowledge of what OACs are.</li> <li>• Knowledge of how OACs work and can be helpful</li> </ul>                                                                         |
| <b>Beliefs about Consequences</b> (Acceptance of the truth, reality, or validity about outcomes of a behaviour in a given situation)                                                                 | <ul style="list-style-type: none"> <li>• What the participant expects/ed from being on an OAC.</li> <li>• Believing/expecting that OACs help reduce the participant's risk of blood clots and/or stroke.</li> <li>• Expecting bleeding from being on an OAC.</li> </ul>                                              |
| <b>Optimism</b> (The confidence that things will happen for the best or that desired goals will be attained)                                                                                         | <ul style="list-style-type: none"> <li>• The confidence that the OAC the participant is taking will protect the participant from experiencing a blood clot/stroke.</li> <li>• The confidence that the OAC the participant is taking will/will not cause serious bleeding.</li> </ul>                                 |
| <b>Emotion</b> (A complex reaction pattern, involving experiential, behavioural, and physiological elements, by which the individual attempts to deal with a personally significant matter or event) | <ul style="list-style-type: none"> <li>• Participant's feeling about accepting/refusing to take an OAC</li> </ul>                                                                                                                                                                                                    |
| <b>Skills</b> (An ability or proficiency acquired through practice)                                                                                                                                  | <ul style="list-style-type: none"> <li>• Participant's communication/interpersonal skills with doctors, other healthcare professionals, and other people with regard to AF and OAC management.</li> </ul>                                                                                                            |
| <b>Beliefs about capabilities</b> (Acceptance of the truth, reality or validity about an ability, talent or facility that a person can put to constructive use)                                      | <ul style="list-style-type: none"> <li>• Participant's belief in one's capability to accept an OAC recommended by the doctors.</li> <li>• Participant's belief in one's ability to self-monitor.</li> <li>• Participant's belief in one's ability to recognise the need to seek help.</li> </ul>                     |
| <b>Reinforcement</b> (Increasing the probability of a response by arranging a dependent relationship, or contingency, between the response and a given stimulus)                                     | <ul style="list-style-type: none"> <li>• Increased/decreased probability of accepting OACs because of participants' previous self-experience with current OAC or other OACs/antiplatelet agents.</li> <li>• Participant's perceived reinforcement from the doctor if accepting the recommended medication</li> </ul> |
| <b>Goals</b> (Mental representations of outcomes or end states that an individual wants to achieve)                                                                                                  | <ul style="list-style-type: none"> <li>• The extent to which accepting to take an OAC compliments with patients broader health goals.</li> </ul>                                                                                                                                                                     |
| <b>Intentions</b> (A conscious decision to perform a behaviour or a resolve to act in a certain way)                                                                                                 | <ul style="list-style-type: none"> <li>• Participant's intention to accept an OAC prescribed by a doctor.</li> <li>• Participant's intention to follow advice from the doctor.</li> </ul>                                                                                                                            |

|                                                                                                                                                                                                                                     |                                                                                                                                                                                                                                                                                                                                                                                                                                                                                                                                                                                            |
|-------------------------------------------------------------------------------------------------------------------------------------------------------------------------------------------------------------------------------------|--------------------------------------------------------------------------------------------------------------------------------------------------------------------------------------------------------------------------------------------------------------------------------------------------------------------------------------------------------------------------------------------------------------------------------------------------------------------------------------------------------------------------------------------------------------------------------------------|
| <b>Memory, attention and decision processes</b><br>(The ability to retain information, focus selectively on aspects of the environment and choose between two or more alternatives)                                                 | <ul style="list-style-type: none"> <li>• Participant's ability to understand and retain AF- and OAC-related information in accepting/not accepting to take the recommended OAC.</li> <li>• Participant's ability to choose a specific OAC from two or more alternatives.</li> <li>• Participant's ability to weigh the risk vs benefit of taking OACs.</li> </ul>                                                                                                                                                                                                                          |
| <b>Social/professional role and identity</b> (A coherent set of behaviours and displayed personal qualities of an individual in a social or work setting)                                                                           | <ul style="list-style-type: none"> <li>• Participant's perceived role in accepting to take the recommended OAC.</li> <li>• Believing that patients should do as told without asking questions.</li> </ul>                                                                                                                                                                                                                                                                                                                                                                                  |
| <b>Social influences</b> (Those interpersonal processes that can cause individuals to change their thoughts, feelings, or behaviours)                                                                                               | <ul style="list-style-type: none"> <li>• The influence of other people's experience with OACs on participant's acceptance an OAC recommended by a doctor.</li> <li>• The influence of other people's opinions on OACs on participant accepting an OAC recommended by a doctor.</li> <li>• Availability of support from people (family, friends, healthcare professionals, etc.) that helped the patient accept to take OAC as recommended.</li> <li>• Influence of participant's relationship with the doctor on accepting OACs or other medications recommended by the doctor.</li> </ul> |
| <b>Environmental context and resources</b> (Any circumstance of a person's situation or environment that discourages or encourages the development of skills and abilities, independence, social competence and adaptive behaviour) | <ul style="list-style-type: none"> <li>• Barriers and facilitators (e.g. the healthcare system, distance from various health services, cost, etc.) that affect participant's acceptance of taking the recommended OAC.</li> </ul>                                                                                                                                                                                                                                                                                                                                                          |
| <b>Behavioural regulation</b> (Anything aimed at managing or changing objectively observed or measured actions)                                                                                                                     | <ul style="list-style-type: none"> <li>• Participant's ability to regulate acceptance of different medications.</li> </ul>                                                                                                                                                                                                                                                                                                                                                                                                                                                                 |
